# Supplementary material for: Monitoring of Paenibacillus larvae in Lower Austria through DNA-Based Detection without De-Sporulation: 2018 to 2022
Source: MDPI journal article supplement (doi:10.3390/vetsci10030213), 2023-03-10
Supplement: s1 [file s1]

**Supplementary Figure S1.** A typical RT-PCR plot from the commercial RT-PCR kit for *Paenibacillus larvae*. Yellow curve: positive control; yellow line: negative control; green curves are different samples and the blue line is the calculated cut-off value defined by the cycler-software.

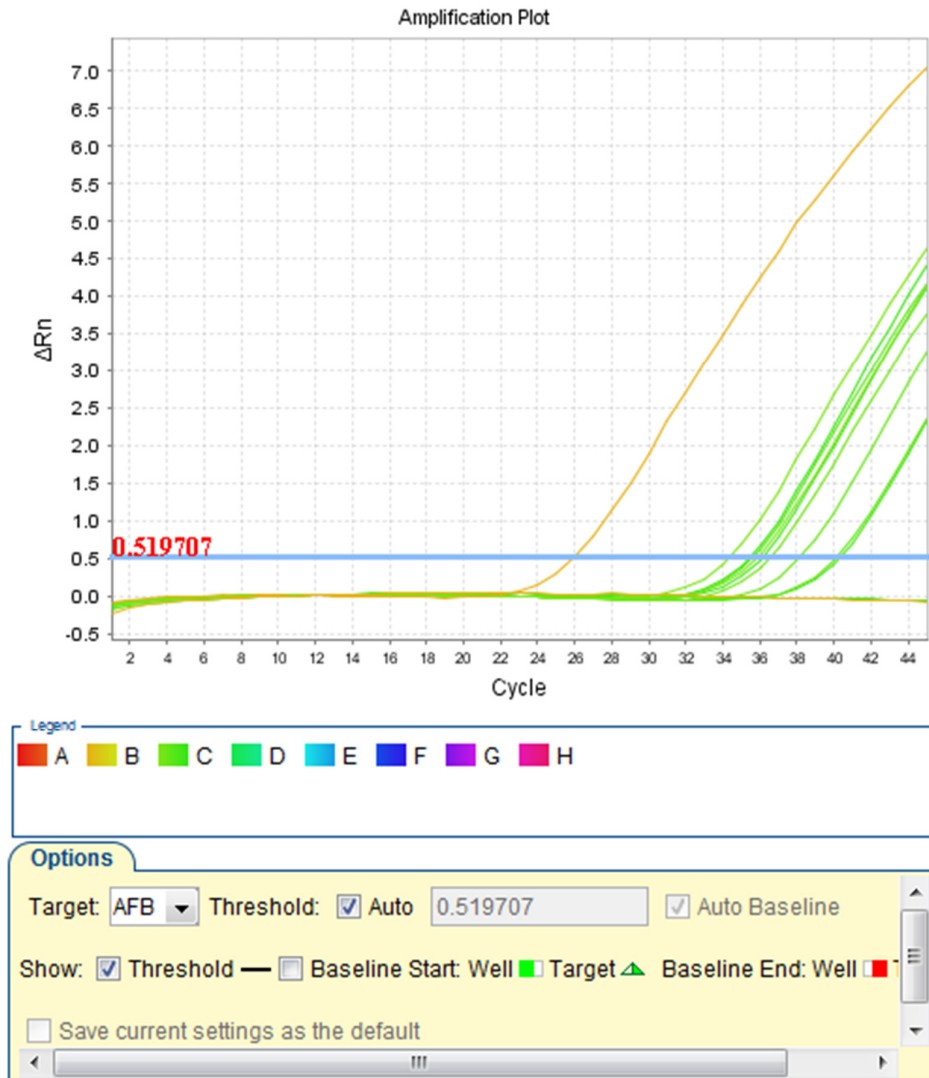

**Supplementary Figure S2.** Average temperatures per month, averaged from three weather stations located in the study region (Lunz am See, Oberndorf an der Melk, Wieselburg), in °C. In 2018, average temperatures in February were lower than in the following years.

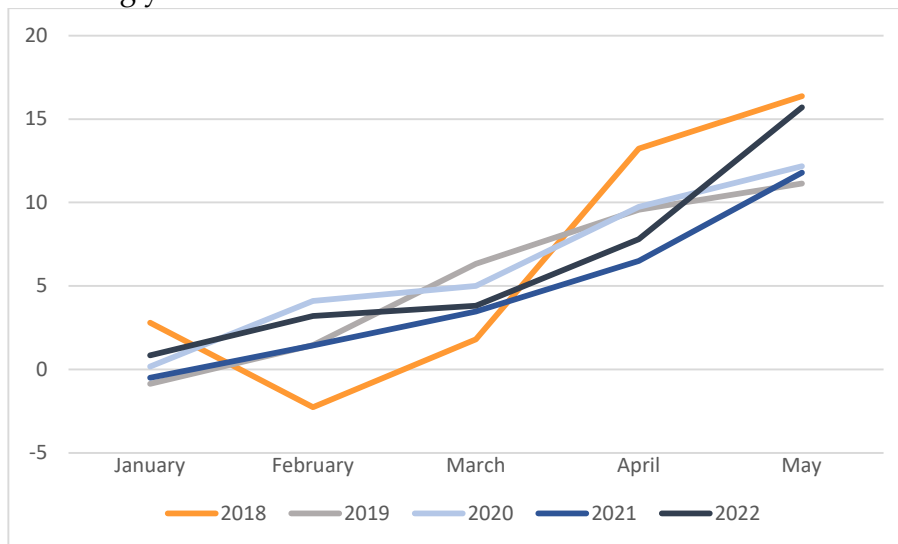

Temperature data were obtained from the Austrian weather service - Zentralanstalt für

Meteorologie und Geodynamik ([https://www.zamg.ac.at/cms/en/climate/climate-overview/current\\_climate](https://www.zamg.ac.at/cms/en/climate/climate-overview/current_climate); last accessed 28 Feb 2023).
